# Supplementary material for: The relative power of individual distancing efforts and public policies to curb the COVID-19 epidemics
Source: PubMed Central journal article supplement (PMC8104446; doi:10.1371/journal.pone.0250764), 2021-05-07
Supplement: pone.0250764.s001.pdf [file pone.0250764.s001.pdf]

# The relative power of individual distancing efforts and public policies to curb the COVID-19 epidemics

## S1 File. List of parameters

| Symbol               | Interpretation                                                                 | Value                     |
|----------------------|--------------------------------------------------------------------------------|---------------------------|
| $t_0$                | Time when the epidemic started                                                 | February 3rd [16]         |
| $t_1$                | Time when the lockdown started                                                 | March 17th                |
| $t_2$                | Time when the lockdown ends                                                    | May 11th                  |
| $t_3$                | Time when intermediate lockdown ends                                           | June 17th                 |
| $t_4$                | Time when second lockdown started                                              | October 30th              |
| $S_0$                | Number of susceptible at time $t_0$                                            | $66.99 \cdot 10^6$        |
| $L_0$                | Number of latent infectious at time $t_0$                                      | 3.675 [16]                |
| $A_0$                | Number of asymptomatic or mildly infectious cases at time $t_0$                | 0.892 [16]                |
| $I_0$                | Number of severe symptomatic infectious cases at time $t_0$                    | 1                         |
| $\tau$               | Transmission rate at early stage                                               | $4.23 \cdot 10^{-9}$ [16] |
| $\gamma$             | Death due to the disease                                                       | fitted                    |
| $\nu^{-1}$           | Average duration (days) of the asymptomatic period                             | 7 [16]                    |
| $f$                  | Fraction of asymptomatic infectious who become reported symptomatic infectious | 0.29                      |
| $\nu_1 = f\nu$       | Rate at which asymptomatic infectious become reported symptomatic infectious   |                           |
| $\nu_2 = (1 - f)\nu$ | Rate at which asymptomatic infectious become unreported symptomatic infectious |                           |
| $\eta^{-1}$          | Average time symptomatic infectious have symptoms                              | 7                         |

**Table 1. Table of epidemiological parameters.** Numbers in brackets refer to the reference list (main article). Other parameters described at length in main article are not reported.
